# Supplementary material for: Samm50 Promotes Hypertrophy by Regulating Pink1-Dependent Mitophagy Signaling in Neonatal Cardiomyocytes
Source: Front Cardiovasc Med. 2021 Sep 22;8:748156. doi: 10.3389/fcvm.2021.748156 (PMC8493082; doi:10.3389/fcvm.2021.748156)
Supplement: Supplementary file 1 [file Table_1.XLSX]

## Sheet: shRNAs sequences
Supplementary Table 1. shRNAs sequences
	Target Sequences
shSamm50	GGAAGCTAGCTGAGTGCAT
shPink	CCTGGCTGACTATCCTGATAT
